# Supplementary material for: Lifeact-mEGFP Reveals a Dynamic Apical F-Actin Network in Tip Growing Plant Cells
Source: PubMed Central journal article supplement (PMC2684639; doi:10.1371/journal.pone.0005744), 2009-05-29
Supplement: pone.0005744.s001.pdf [file pone.0005744.s001.pdf]

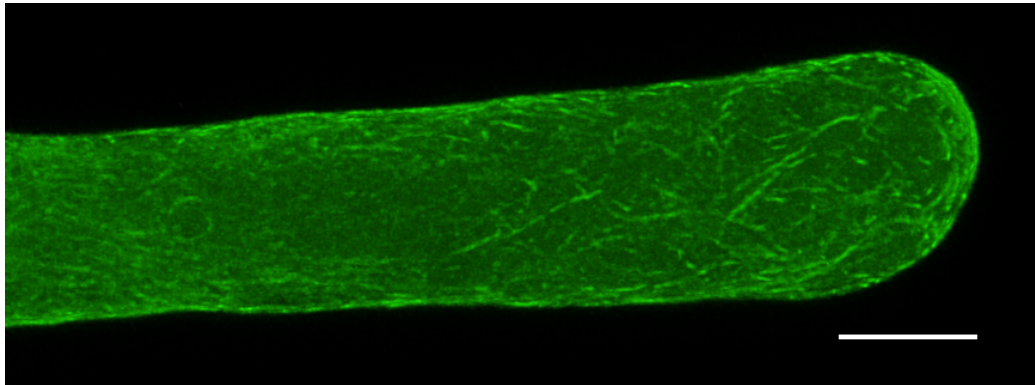

Supplemental figure 1
